# Supplementary material
Source: PubMed Central journal article supplement (PMC7039541)
Supplement: supp_RA119.011319_156220_2_supp_455009_q3snc8.pdf [file supp_RA119.011319_156220_2_supp_455009_q3snc8.pdf]

A fluorescence activatable reporter of flavivirus NS2B-NS3 protease activity enables live imaging of infection in single cells and viral plaques

**Jorge L. Arias-Arias<sup>1</sup>, Derek J. MacPherson<sup>2</sup>, Maureen E. Hill<sup>2</sup>, Jeanne A. Hardy<sup>2</sup>, and Rodrigo Mora-Rodríguez<sup>1\*</sup>**

From <sup>1</sup>Centro de Investigación en Enfermedades Tropicales (CIET), Facultad de Microbiología, Universidad de Costa Rica, San José 11501-2060, Costa Rica; <sup>2</sup>Department of Chemistry, 104 LGRT, 710 N. Pleasant St., University of Massachusetts Amherst, MA 01003, USA

Supporting information file containing:

- Table S1. Reporter variants tested *in vitro* for cleavage and fluorescence activation upon treatment with recombinant DENV-2 NS2B-NS3 protease.
- Figure S1. Cleavage kinetics of fluorescence-activated GFP reporter variants by DENV-2/ZIKV NS2B-NS3 proteases *in vitro*.
- Figure S2. The FlaviA-GFP reporter becomes fluorescent in stably-transduced BHK-21 cells upon DENV-2, ZIKV, and YFV infection.
- Figure S3. The FlaviA-GFP reporter becomes cleaved in stably-transduced BHK-21 cells upon YFV infection.
- Figure S4. Stable expression of the FlaviA-GFP and FlaviA-mNeptune reporters in combination with dyes of chromatin and cell death has no effect on flaviviruses replication in mammalian cells.
- Figure S5. Multiple sequence alignment of the internal NS3 cleavage site from ten medically important flaviviruses.

**Table S1. Reporter variants tested *in vitro* for cleavage and fluorescence activation upon treatment with recombinant DENV-2 NS2B-NS3 protease.**

| Reporter variant | Linker sequence         |    |    |    |    |    |     |     |     |     |           |     |                            | State after treatment with recombinant DENV-2 NS2B-NS3 protease |
|------------------|-------------------------|----|----|----|----|----|-----|-----|-----|-----|-----------|-----|----------------------------|-----------------------------------------------------------------|
|                  | P6                      | P5 | P4 | P3 | P2 | P1 | P1' | P2' | P3' | P4' | P5'       | P6' | P7'                        |                                                                 |
| DENVA-GFPv1      | <i>GFP</i> <sup>*</sup> |    |    | G  | R  | R  | D   | F   | Q   | G   | P         | C   | <i>QP</i> <sup>+</sup>     | Uncleaved, Non-fluorescent                                      |
| DENVA-GFPv2      | <i>GFP</i>              |    |    | G  | R  | R  | G   | F   | Q   | G   | P         | C   | <i>QP</i>                  | Uncleaved, Non-fluorescent                                      |
| DENVA-GFPv3      | <i>GFP</i>              | D  | E  | G  | R  | R  | G   | G   | P   | C   | <i>QP</i> |     | Uncleaved, Non-fluorescent |                                                                 |
| DENVA-GFPv4      | <i>GFP</i>              | D  | K  | K  | R  | R  | G   | G   | S   | G   | <i>QP</i> |     | Cleaved, Non-fluorescent   |                                                                 |
| FlaviA-GFP       | <i>GFP</i>              | A  | A  | Q  | R  | R  | G   | R   | I   | G   | <i>QP</i> |     | Cleaved, Fluorescent       |                                                                 |
| ZIKVA-GFP        | <i>GFP</i>              | K  | T  | G  | K  | R  | S   | G   | A   | L   | <i>QP</i> |     | Cleaved, Fluorescent       |                                                                 |
| DENV2A-GFP       | <i>GFP</i>              | V  | K  | K  | Q  | R  | A   | G   | V   | L   | <i>QP</i> |     | Cleaved, Fluorescent       |                                                                 |

<sup>\*</sup>Position within the green fluorescent protein sequence.

<sup>+</sup>Position within the quenching peptide sequence.

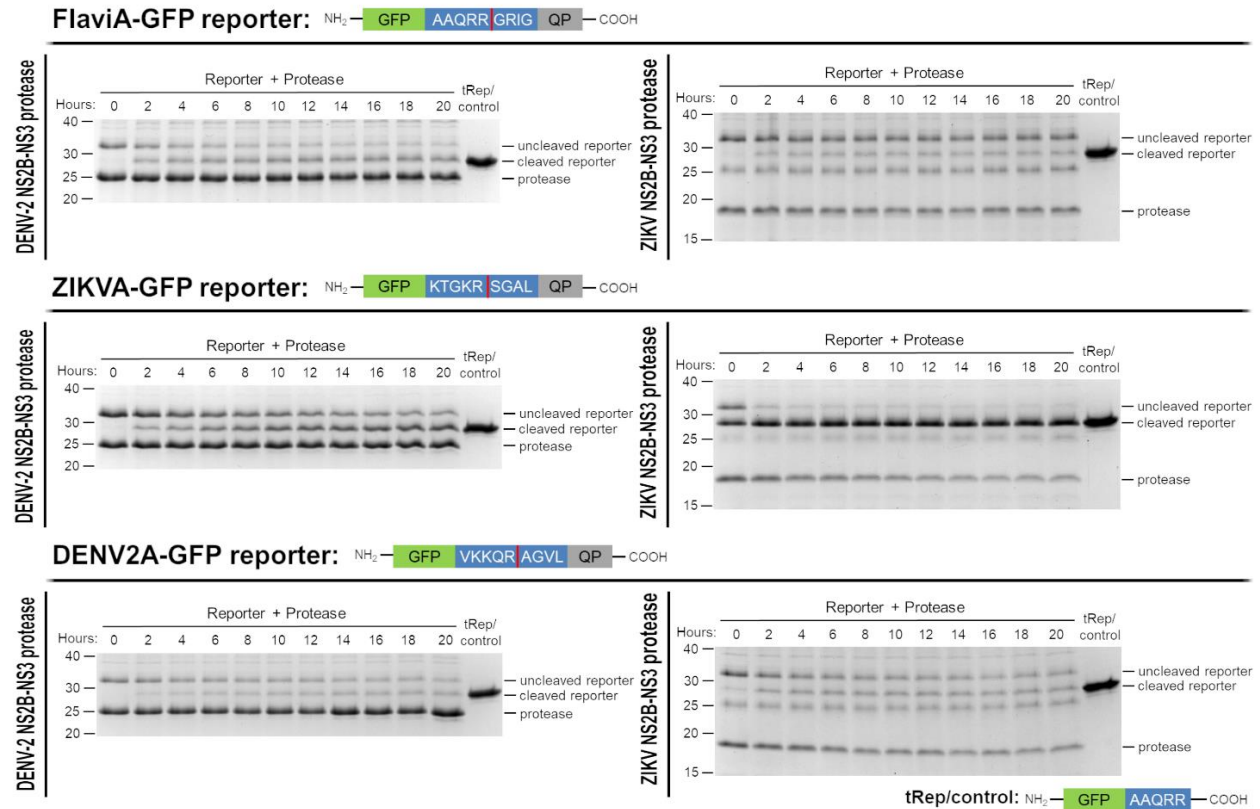

**Figure S1. Cleavage kinetics of flavivirus-activatable GFP reporter variants by DENV-2/ZIKV NS2B-NS3 proteases *in vitro*.** Three variants of the flavivirus-activatable GFP reporter were developed by changing the linker sequence: ZIKVA-GFP (ZIKV polyprotein NS2B/NS3 cleavage site linker), DENV2A-GFP (DENV-2 polyprotein NS2B/NS3 cleavage site linker), and FlaviA-GFP with the internal NS3 cleavage site linker which is present in many members of the *Flavivirus* genus. For the *in vitro* cleavage kinetics, purified reporter proteins were mixed with purified DENV-2 NS2B-NS3 protease (left panel) or ZIKV NS2B-NS3 protease (right panel) at a molar ratio of 1:1 and incubated for given times. Reactions were quenched by thermal treatment in SDS loading buffer and samples were analyzed by SDS-PAGE and staining of the gels with Coomassie blue. tRep/control is an engineered cleaved version of the FlaviA-GFP protein and was used as size marker of cleaved reporters.

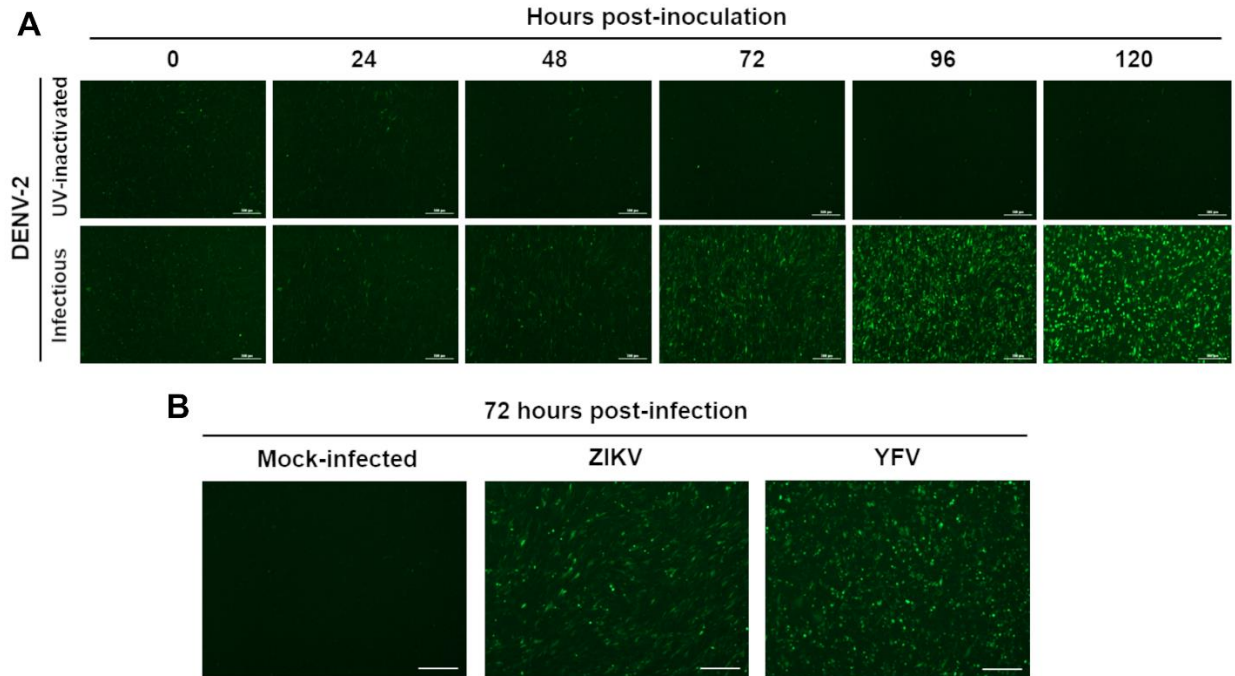

**Figure S2. The FlaviA-GFP reporter becomes fluorescent in stably-transduced BHK-21 cells upon DENV-2, ZIKV, and YFV infection.** Stable BHK-21 cells expressing the FlaviA-GFP reporter were inoculated with DENV-2 13538, ZIKV CIET-01, and YFV 17D at a low MOI of 0.1, for the specified time periods. **(A)** Fluorescence kinetics of the FlaviA-GFP reporter in stable BHK-21 cells after inoculation with infectious and UV-inactivated DENV-2. **(B)** Fluorescence of the FlaviA-GFP reporter in stable BHK-21 cells after 72 hour post-infection with ZIKV and YFV. Magnification of 40X, scale bar = 100  $\mu$ m.

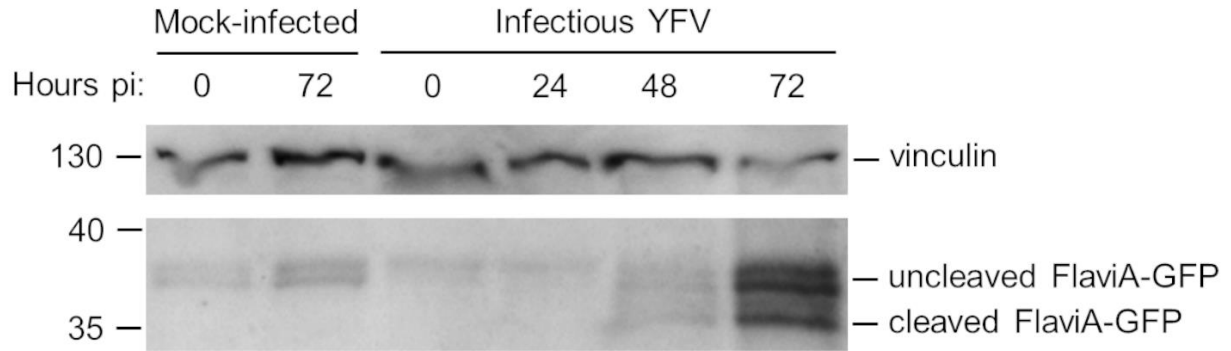

**Figure S3. The FlaviA-GFP reporter becomes cleaved in stably-transduced BHK-21 cells upon YFV infection.** The cleavage kinetics of the FlaviA-GFP reporter in stable BHK-21 cells upon mock or YFV 17D infection at a low MOI of 0.1 was made by western blot for the depicted time periods post-inoculation (pi) and following the protocol described in the experimental procedures.

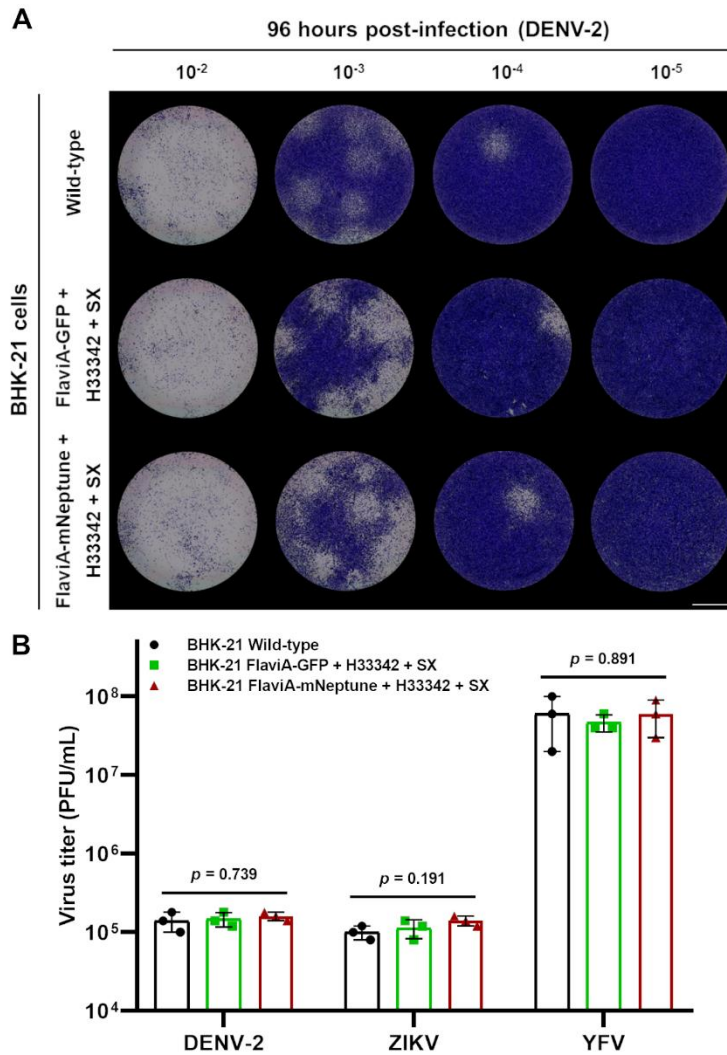

**Figure S4. Stable expression of the FlaviA-GFP and FlaviA-mNeptune reporters in combination with dyes of chromatin and cell death has no effect on flaviviruses replication in mammalian cells.** Wild-type and stable BHK-21 cells expressing either the FlaviA-GFP or the FlaviA-mNeptune reporter together with dyes of chromatin and cell death were used to perform a plaque assay with viral seeds of DENV-2 13538, ZIKV CIET-01, and YFV 17D. **(A)** Comparison of DENV-2 plaque assay in wild-type and stable BHK-21 cells expressing either the FlaviA-GFP or the FlaviA-mNeptune reporter in combination with Hoechst 33342 (H33342) and SYTOX green (SX) at 96 hours post-infection. Images from a representative experiment are shown ( $n =$  three independent experiments, magnification of 40X, scale bar = 1000  $\mu$ m). **(B)** Virus titers for DENV-2, ZIKV, and YFV in wild-type and stable BHK-21 cells expressing either the FlaviA-GFP or the FlaviA-mNeptune reporter together with Hoechst 33342 (H33342) and SYTOX green (SX) at 96 hours post-infection. Data are expressed as mean  $\pm$  SD of three independent experiments.

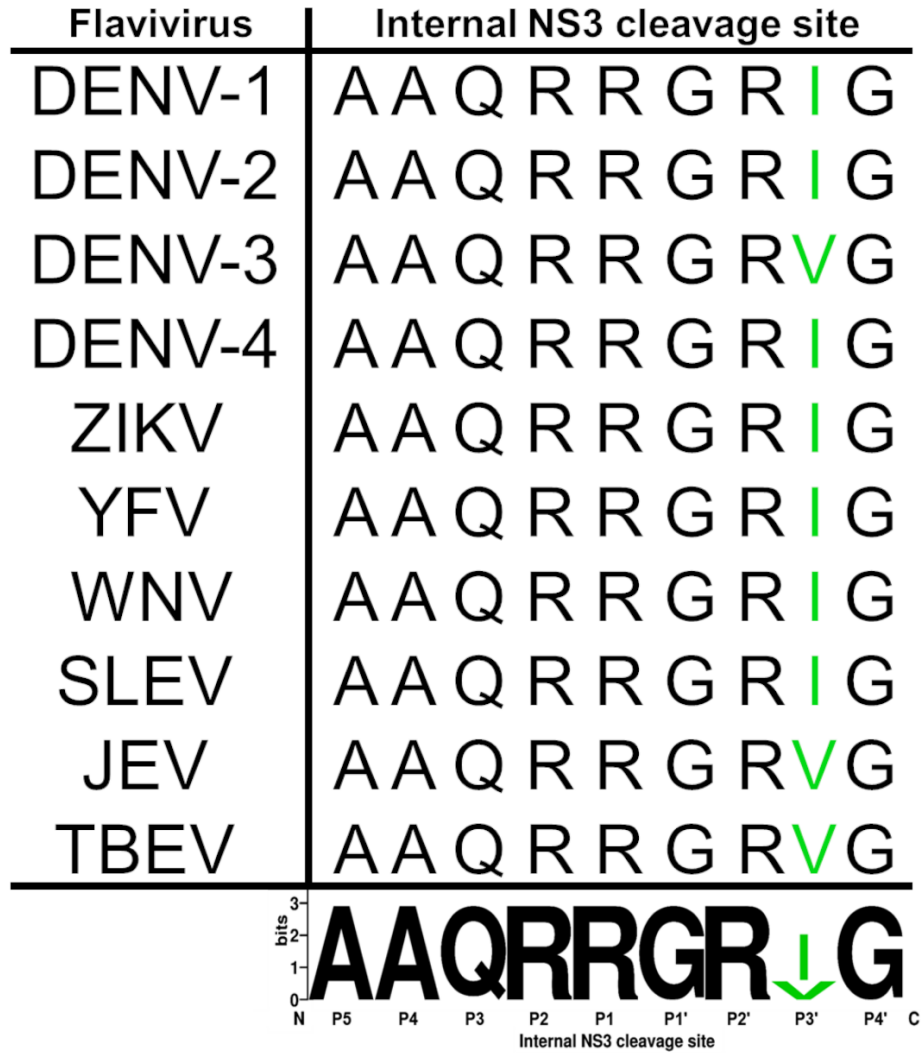

**Figure S5. Multiple sequence alignment of the internal NS3 cleavage site from ten medically important flaviviruses.** Protein sequences of the internal NS3 cleavage site from DENV-1 to 4, ZIKV, YFV, WNV, SLEV, JEV, and TBEV were obtained from the NCBI reference proteins data base (accession numbers NP\_059433.1, NP\_056776.2, YP\_001621843.1, NP\_073286.1, YP\_009428568.1, NP\_041726.1, YP\_001527877.1, YP\_001008348.1, NP\_059434.1, and NP\_043135.1, respectively), aligned by Clustal Omega (<https://www.ebi.ac.uk/Tools/msa/clustalo/>), and visualized with WebLogo (<https://weblogo.berkeley.edu/logo.cgi>).
